# Supplementary material for: New pyrazolopyridine and pyrazolothiazole-based compounds as anti-proliferative agents targeting c-Met kinase inhibition: design, synthesis, biological evaluation, and computational studies
Source: Royal Society of Chemistry journal article supplement (doi:10.1039/d3ra01931d), 2023-01-01
Supplement: d3ra01931d1.pdf [file d3ra01931d1.pdf]

## Supplementary material

### 2. Experimental

#### 2.1. Chemistry

Melting points are uncorrected and were determined in open capillary tubes using electric melting point apparatus (G-K). Infrared spectra (KBr discs) were measured on a Shimadzu FTIR, 8300 PC IR spectrophotometer.  $^1\text{H}$  NMR (300 MHz) and  $^{13}\text{C}$  NMR (75 MHz) was recorded with a Bruker model Ultra Shield NMR spectrometer with TMS as the internal standard and chemical shifts were reported on a  $\delta$  scale (ppm) using  $\text{DMSO-}d_6$  as a solvent, while the coupling constants ( $J$  values) are given in Hz. Elemental analyses were determined on a PerkinElmer 240, and the values found were within  $\pm 0.4\%$  of the theoretical. All reactions were monitored by TLC on Merck Silica Gel 60F254 and spots were detected using a UV lamp (254 nm). The biological activities were carried out in the Medical Mycology Laboratory of the Regional Center for Mycology and Biotechnology of Al-Azhar University, Cairo, Egypt.

#### 2.2. *In vitro* anticancer screening

The cell lines were purchased from the American Type Culture collection as follows: liver carcinoma cell line (HepG2), breast carcinoma cell line (MCF-7), and colorectal cancer cell line (HCT). Cytotoxic activity screening was performed using MTT assay at Regional Center for Mycology and Biotechnology, Al- Azhar University. Exponentially, cells were placed in  $10^4$  cells/well for 24 h, and then add fresh medium which containing different concentration of the tested sample. Serial two-fold dilution of the tested sample were added using a multichannel pipette. Moreover, all cells were cultivated at  $37\text{ }^\circ\text{C}$ ,  $5\%$   $\text{CO}_2$  and  $95\%$  humidity. Also, incubation of control cells occurred at  $37\text{ }^\circ\text{C}$ . However, after incubation for 24 h different concentrations of sample (50, 25, 12.5, 6.25, 3.125, 1.56 and  $0\text{ }\mu\text{g L}^{-1}$ ) were added and continued the incubation for 48 h, then, add the crystal violet solution 1% to each well for 0.5 h to examine viable cells. Rinse the wells using water until no stain. After that, add 30% glacial acetic acid to all wells with shaking plates on Microplate reader (TECAN, Inc.) to measure the absorbance, using a test wavelength of 490 nm. Besides, compare the treated samples with the control cell. The cytotoxicity was estimated by  $\text{IC}_{50}$  in ( $\mu\text{g /mL}$ ), the concentration that inhibits 50% of growth of cancer cell.

#### 2.3. c-Met kinase assay

The c-Met kinase activity was determined in 384-well plates using homogenous timeresolved fluorescence (HTRF) assays following the manufacture's instruction. The compounds **5a** and **5b**

were dissolved in DMSO and diluted to different concentrations with kinase buffer. First, 4  $\mu\text{l}$  of each compound solution, 2  $\mu\text{l}$  of TK substrate solution (5  $\mu\text{M}$ ), 2  $\mu\text{l}$  of c-met solution (0.3075  $\mu\text{g/ml}$ ), 2  $\mu\text{l}$  of ATP solution (15  $\mu\text{M}$ ) were successively added to each well. Reactions were incubated for 40 min at 37 °C and stopped by the addition of 10  $\mu\text{l}$  mixed solution containing 5  $\mu\text{l}$  SA-XL665 (0.5  $\mu\text{M}$ ) and 5  $\mu\text{l}$  TK Antibody, and Sealing plate incubation for 1 h at 37 °C. The fluorescence at 620 nm and 665 nm was measured with Mithras LB943 (Bethold, Germany) using the excitation light at 320 nm. The inhibition rate (%) was calculated using the following equation: % inhibition =  $100 - [(\text{activity of enzyme with tested compounds} - \text{min}) / (\text{max} - \text{min})] \times 100$  (max: the observed enzyme activity measured in the presence of enzyme, substrates, and cofactors; min: the observed enzyme activity in the presence of substrates, cofactors and in the absence of enzyme). IC<sub>50</sub> values were processed by SPSS 19.0 statistical software from the inhibition curves. The experimental results were expressed by mean  $\pm$  SD of three independent experiments.

#### **2.4. Cell cycle analysis**

Further exploration of the cytotoxic activity of compound **5a** was performed using propidium iodide (PI) flow cytometric analysis to measure the extent of PI that binds to DNA of dead cells with permeable plasma membranes to determine cell cycle status in tissue culture quantitate cell death at all cell phases. After incubation of HepG-2 cells with compound **5a**, cells were fixed with ethanol then dehydrated before staining with PI according to the reported methodology.

#### **2.5. Annexin-V FTIC apoptotic study**

Estimation of fractional DNA content (aka sub-G1 assay) is a widely used assay to determine apoptosis. Cleavage of genomic DNA into smaller fragments (180–200 bp lengths) is a hallmark for apoptosis in numerous cells. PI stained cells will stain less intensely and show a peak below the G1 peak (Sub-G1). In this work, flow cytometer with Annexin V-fluorescein isothiocyanate/propidium iodide FITC/PI double staining apoptosis detection kit (K101, Biovision) was used to study apoptosis of HepG-2 cells treated with compound **5a**. Cells were incubated, collected by centrifugation, re-suspended in 500  $\mu\text{L}$  of 1X binding buffer. Annexin V-FITC (5  $\mu\text{L}$ ) and PI (5  $\mu\text{L}$ ) was added and incubation was continued for additional 5 min in the dark at room temperature. Annexin V-FITC binding was analyzed by flow cytometry using FITC signal detector (FL1) and PI staining by FL2 phycoerythrin emission signal detector [75].

#### **2.6. Estimation of Bax and Bcl-2 Levels**

Quantitative determination of pro-apoptotic BAX and anti-apoptotic Bcl-2 proteins in human cell lysates was performed using DRG® Human Bax ELISA (EIA-4487) and Zymed® Bcl-2 ELISA Kit (99-0042). Procedures of the colorimetric kits were performed according to the manufacturer's instructions [76,77]. Protein of interest in the samples and standards binds to the antibody coated on the plate. A biotin-conjugated antibody is added and binds to protein captured by the first antibody. Streptavidin-HRP is added and binds to the biotin-conjugated antibody. The substrate solution is added to the wells to form the colored products. The reaction is then terminated by addition of acid and absorbance is measured at 450 nm. A standard curve is prepared to determine the protein concentration.

### **2.7. Estimation of Human p53 Level**

Human p53 present in HepG-2 cells was determined; using Human p53 ELISA-Kit (CS0070 Sigma) read using spectrophotometer at 450 nm against untreated control cells (negative control) and Erlotinib (positive control) applying the standard protocols of the manufacturers [78]. The samples or standard having human p53 bind to antibodies adsorbed to the microwells. Addition of biotin-conjugated was followed by incubation and addition of dispense of unbound biotin-conjugated streptavidin HRP. Then, the reaction was terminated by adding acid, and the absorbance was measured at 450 nm.

### **2.8. Human CASP-3 (Caspase-3) Estimation**

Sandwich enzyme linked immuno-sorbent ELISA assay kits rely upon containment of a certain protein in a sandwich of distinct antibodies conjugated to a colorimetric 3,3', 5,5' - Tetramethylbenzidine (TMB) substrate. Antibody-substrate intensity is measured spectrophotometrically to weight up the caspase protein quantity. KHO1091 invitrogen caspase-3 was used in this study to estimate caspase-3 activity. After dilution of cell lysates and detection of antibody protein linked to anti-rabbit-IgG-HRP, microwells were then incubated. A colored product was then produced upon addition of TMB Substrate Solution. A stop solution was added in the last step before measuring color intensity at 450 nm. [79].

### **2.9. Molecular docking study**

The molecular docking simulation of the promising *in vitro* screened derivatives **5a** and **5b** against c-Met was done using the Molecular Operating Environment software (MOE-Dock) version 2014.0901 [70,71]. The co-crystallized structure of c-Met kinase complexed with its native ligand, *N*-{3-fluoro-4-[(7-methoxyquinolin-4-yl)oxy]phenyl}-1-[(2R)-2-hydroxypropyl]-5-

methyl-3-oxo-2-phenyl-2,3-dihydro-1*H*-pyrazole-4-carboxamide, was downloaded from the protein data bank (PDB code: 3U6I) [72]. Initially, the original ligand was re-docked into the active binding site of c-Met kinase to assess the root-mean-square deviation value. Then, the docking studies of the newly targeted compounds were estimated following to the previously reported procedure [80,81].

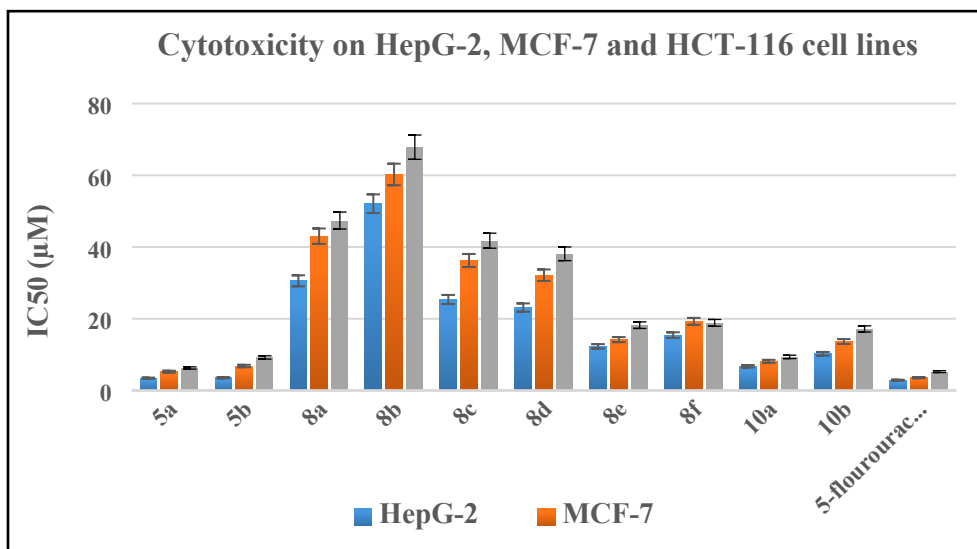

**Fig. 1.** Cytotoxic activity of the new target compounds against HepG-2, MCF-7, HCT-116 cancer cell lines

**Table 1:** Predicted Pharmacokinetic Properties of pyrazolo[3,4-*b*]pyridine-5-carbonitrile derivatives **5a** and **5b**.

| Comp. No. | GIT absorption | BBB permeability | P-gp substrate | Bioavailability score | PAINS alert |
|-----------|----------------|------------------|----------------|-----------------------|-------------|
| <b>5a</b> | low            | NO               | NO             | 0.55                  | 0           |
| <b>5b</b> | low            | NO               | NO             | 0.55                  | 0           |

113-3652-01  
Archive directory: A:\msport\hms\mml\vwertyr\data  
Sample directory: 00Hm\_144\_1294\2014-11-24-14  
File: PROTON  
Pulse Sequence: s2pul  
Solvent: DMSO  
Temp: 35.0 C / 300.1 K  
Mercury-30000 "MMS200"  
Relax. delay: 1.000 sec  
Pulse: 60.0 degrees  
Acq. Time: 4.853 sec  
Width: 8606.7 Hz  
24 repetitions  
OBSERVE: F1, 300.14637645 MHz  
DATA PROCESSING  
F1 size: 65536  
Total time: 46 min, 32 sec

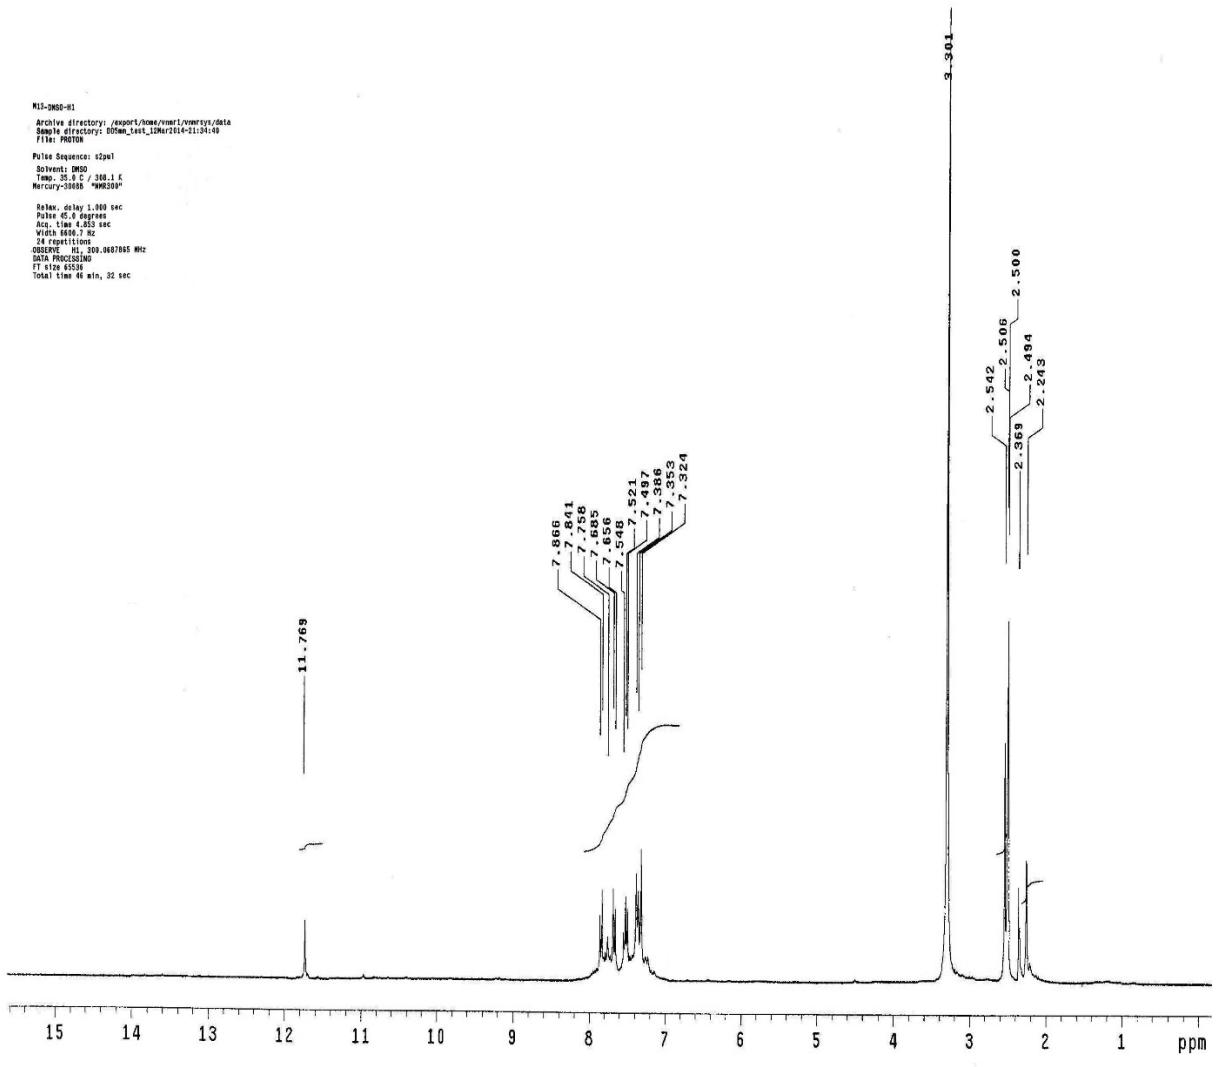

S1. <sup>1</sup>H NMR of compound 5a

M4-DMSO-C13

Archive directory: /export/home/vnmr1/vnmrsys/data  
Sample directory: DD5mm\_test\_12Mar2014-21:34:40

Pulse Sequence: s2pu1  
Solvent: DMSO  
Temp. 30.0 C / 303.1 K  
Mercury-300BB "NMR300"

Pulse 67.5 degrees  
Acq. time 1.707 sec  
Width 18761.7 Hz  
1616 repetitions  
OBSERVE C13, 75.4523971 MHz  
DECOUPLE H1, 300.0702830 MHz  
Power 40 dB  
continuously on  
WALTZ-16 modulated  
DATA PROCESSING  
Line broadening 1.0 Hz  
FT size 65536  
Total time 8 hr, 2 min, 40 sec

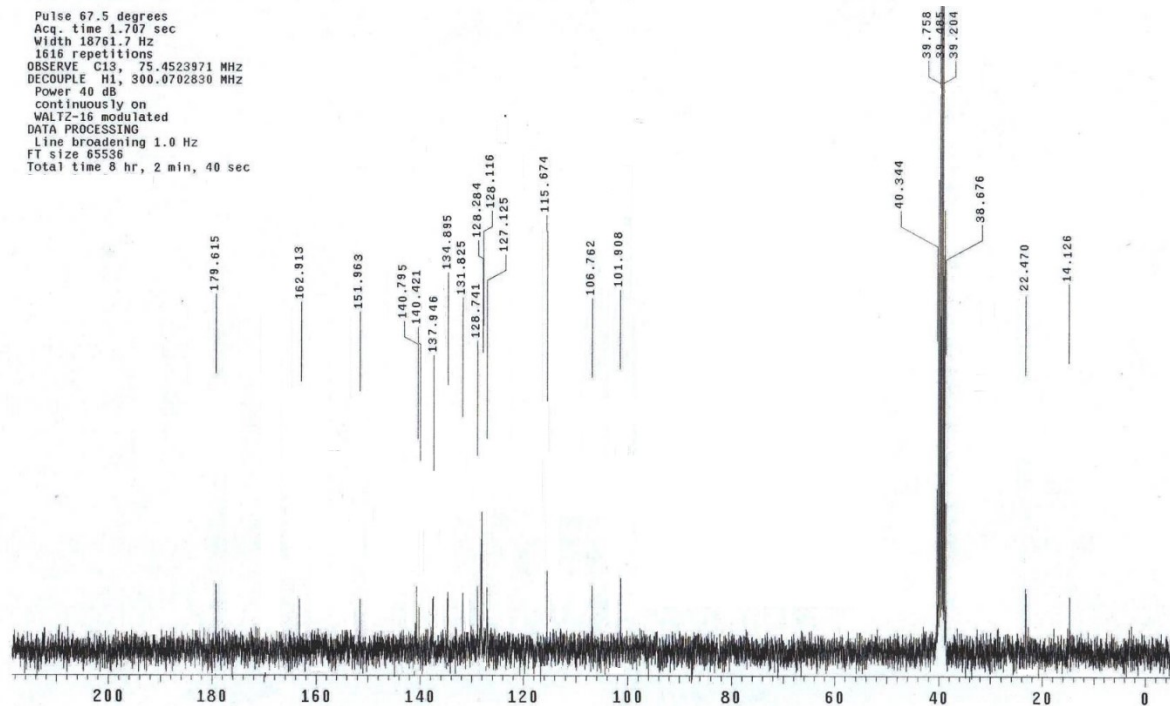

S2.  $^{13}\text{C}$  NMR of compound 5a

Mercury-300BB "NMR300"

Relax. delay 1.000 sec

Pulse 74.1 degrees

Acq. time 4.004 sec

Width 8000.0 Hz

7 repetitions

OBSERVE H1, 300.0687875 MHz

DATA PROCESSING

FT size 65536

Total time 19 min, 19 sec

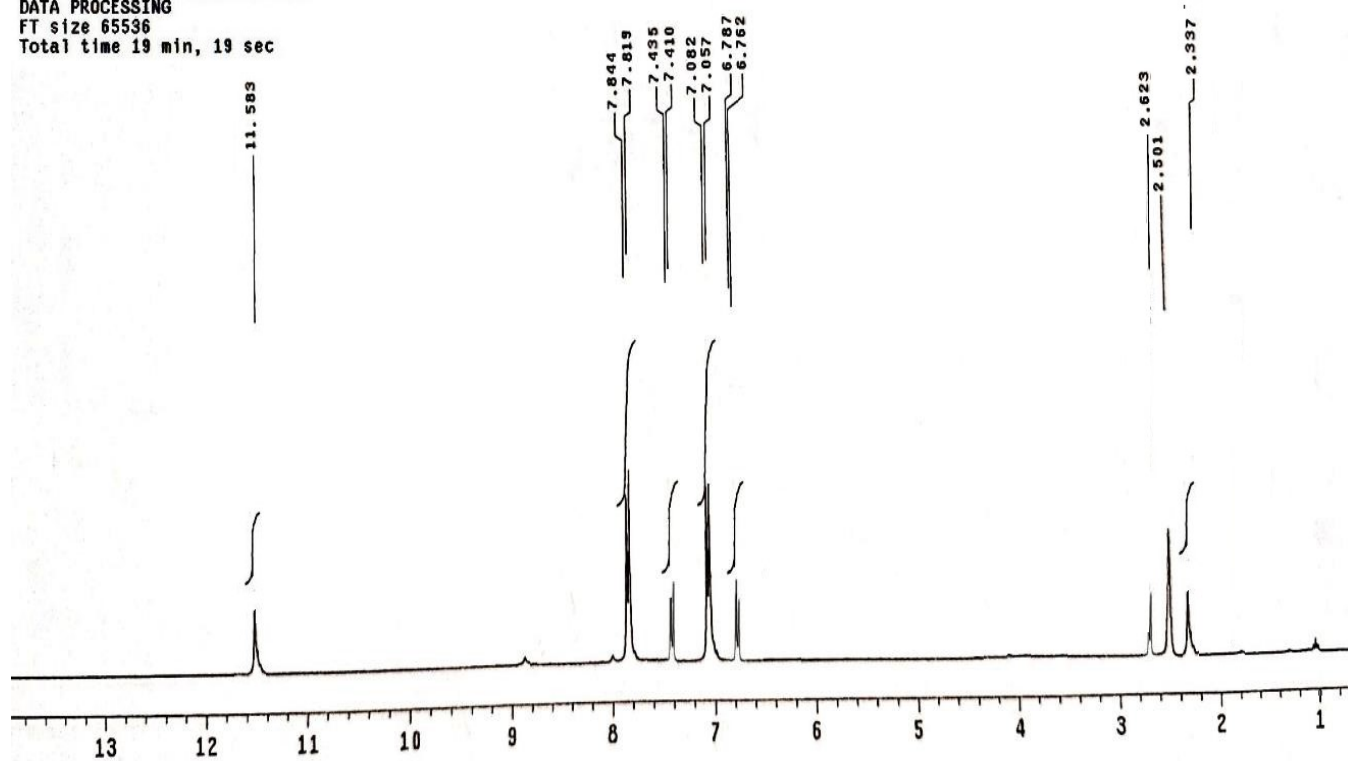

S3. <sup>1</sup>H NMR of compound 5b

A2-DMSO-C13

Archive directory: /export/home/vnmr1/vnmrsys/data  
Sample directory: D05mm\_test\_12Mar2014-21:34:40

Pulse Sequence: s2pul  
Solvent: DMSO  
Temp. 40.0 C / 313.1 K  
Mercury-300BB

Pulse 45.0 degrees  
Acq. time 1.815 sec  
Width 16761.7 Hz  
440 repetitions  
OBSERVE C13, 75.4523965 MHz  
DECOUPLE H1, 300.6702830 MHz  
Power 33 dB  
continuously on  
WALTZ-16 modulated  
DATA PROCESSING  
Line broadening 1.0 Hz  
FT size 131072  
Total time 32 hr, 58 min, 37 sec

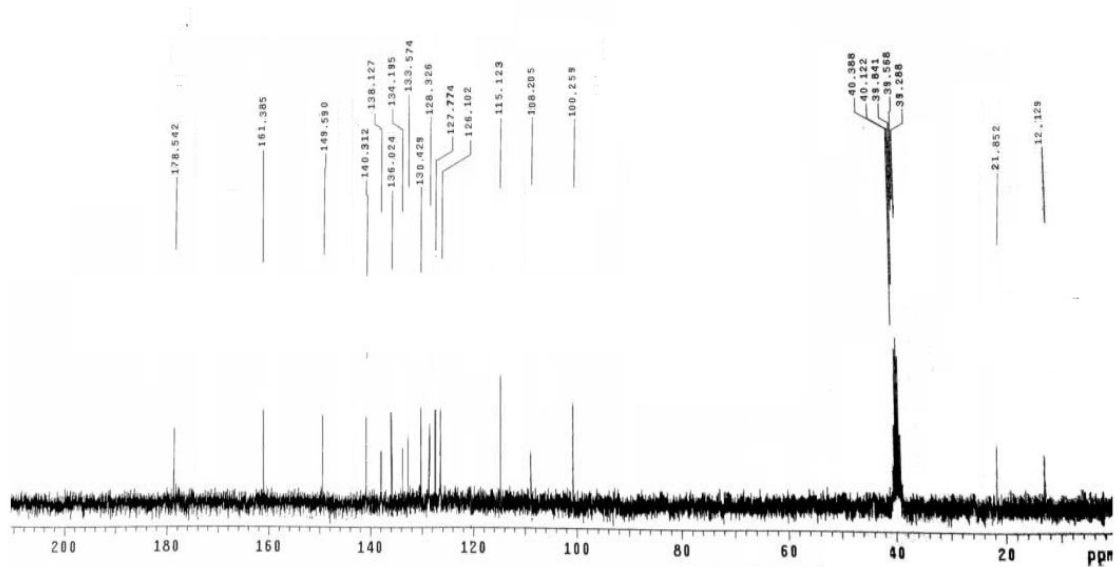

S4. <sup>13</sup>C NMR of compound 5b



M3-DMSO-H1

Archive directory: /export/home/vnmr1/vnmrsys/data  
Sample directory: D05mm\_test\_12Mar2014-21:34:40  
File: PROTON

Pulse Sequence: s2pu1  
Solvent: DMSO  
Temp: 35.0 C / 308.1 K  
Mercury-300SB "NMR300"

Relax. delay 1.000 sec  
Pulse 45.0 degrees  
Acq. time 4.855 sec  
Width 6600.7 Hz  
24 repetitions  
OBSERVE H1, 300.0687865 MHz  
DATA PROCESSING  
FT size 65536  
Total time 46 min, 38 sec

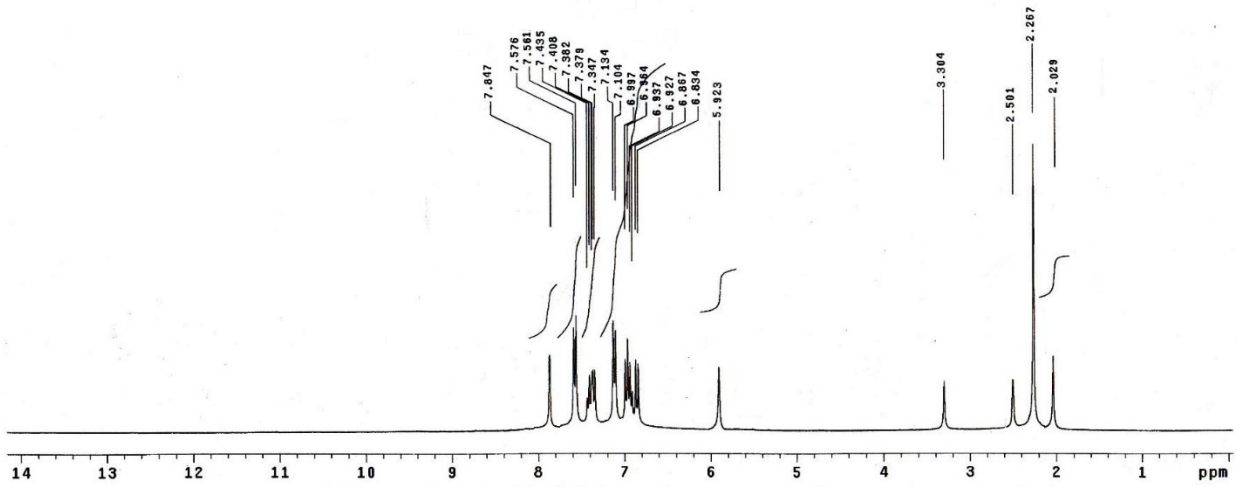

S5. <sup>1</sup>H NMR of compound 8a

Archive directory: /export/home/vnmr1/vnmr5ys/data  
Sample directory: DD5mm\_test\_12Mar2014-21:34:40  
File: PROTON

Pulse Sequence: s2pul  
Solvent: DMSO  
Temp. 40.0 C / 313.1 K  
Mercury-300BB "NMR300"

Pulse 45.0 degrees  
Acq. time 1.815 sec  
Width 18761.7 Hz  
1112 repetitions  
OBSERVE C13, 75.4523997 MHz  
DECOUPLE H1, 300.9702630 MHz  
Power 33 dB  
continuously on  
WALTZ-16 modulated  
DATA PROCESSING  
Line broadening 1.0 Hz  
FT size 131072  
Total time 30 hr, 54 min, 37 sec

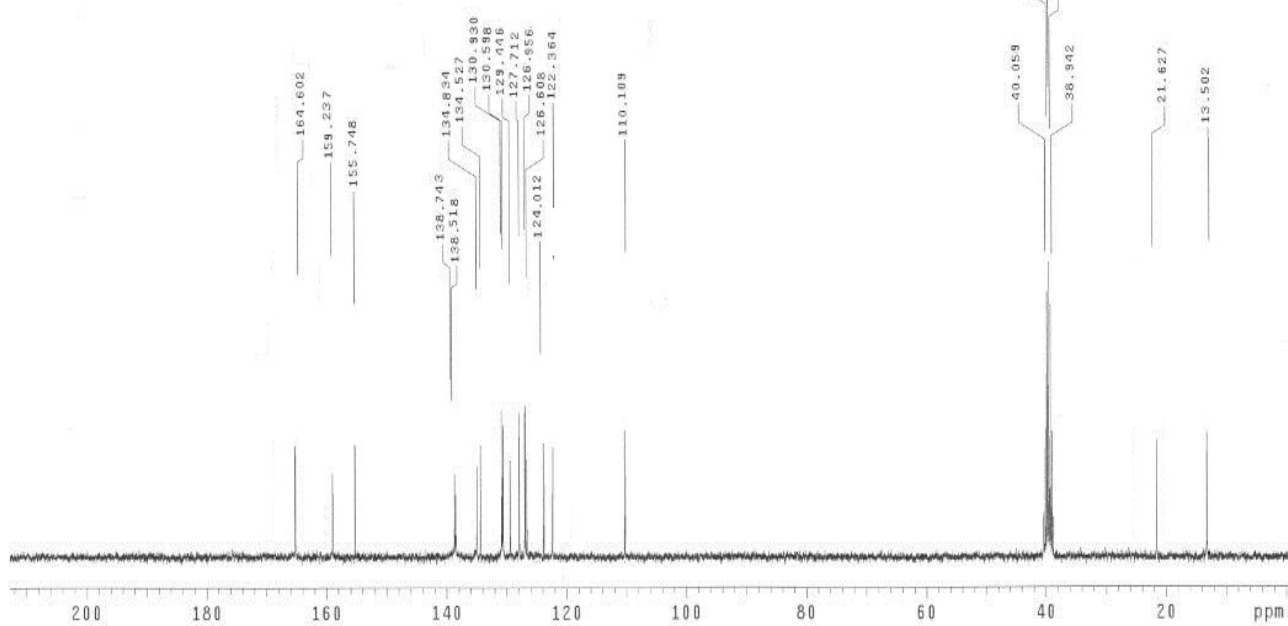

S6. <sup>13</sup>C NMR of compound 8a

A13-DMSO-H1  
Archive directory: /export/home/vnmr1/vnmrsys/data  
Sample directory: DDSmm\_test\_12Mar2014-21:34:40  
File: PROTON  
Pulse Sequence: s2pu1  
Solvent: DMSO  
Temp: 30.0 C / 303.1 K  
Mercury-300SB "NMR300"  
Relax. delay 6.000 sec  
Pulse 45.0 degrees  
Acq. time 4.000 sec  
Width 6600.7 Hz  
9 repetitions  
OBSERVE H1, 300.0687074 MHz  
DATA PROCESSING  
Line broadening 0.5 Hz  
FT size 65536  
Total time 58 min, 55 sec  
Date: Jan 18 2021

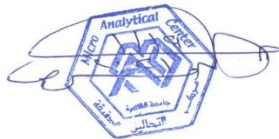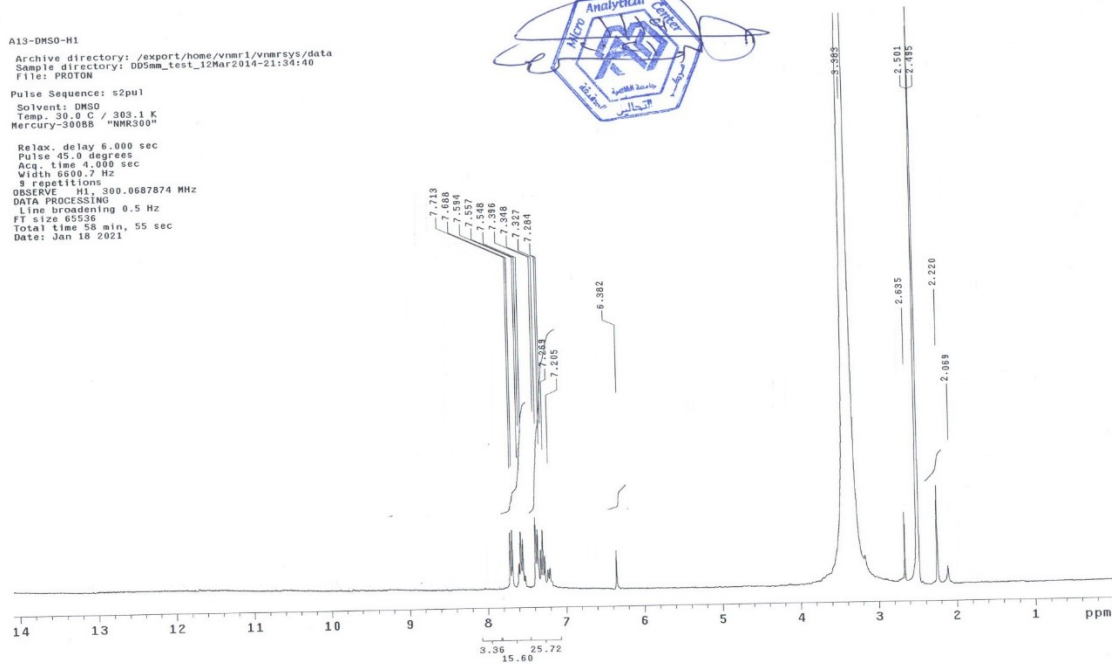

S7.  $^1\text{H}$  NMR of compound **8b**

Archive directory: /export/home/vnmr1/vnmrsys/data  
Sample directory: D05mm\_test\_12Mar2014-21:34:40  
File: PROTON

Pulse Sequence: s2pul  
Solvent: DMSO  
Temp. 30.0 C / 303.1 K  
Mercury-300BB "NMR300"

Pulse 45.0 degrees  
Acq. time 1.815 sec  
Width 18761.7 Hz  
560 repetitions  
OBSERVE C13, 75.4523599 MHz  
DECOUPLE H1, 300.0702830 MHz  
Power 39 dB  
continuously on  
WALTZ-16 modulated  
DATA PROCESSING  
Line broadening 1.0 Hz  
FT size 131072  
Total time 35 hr, 45 min, 37 sec

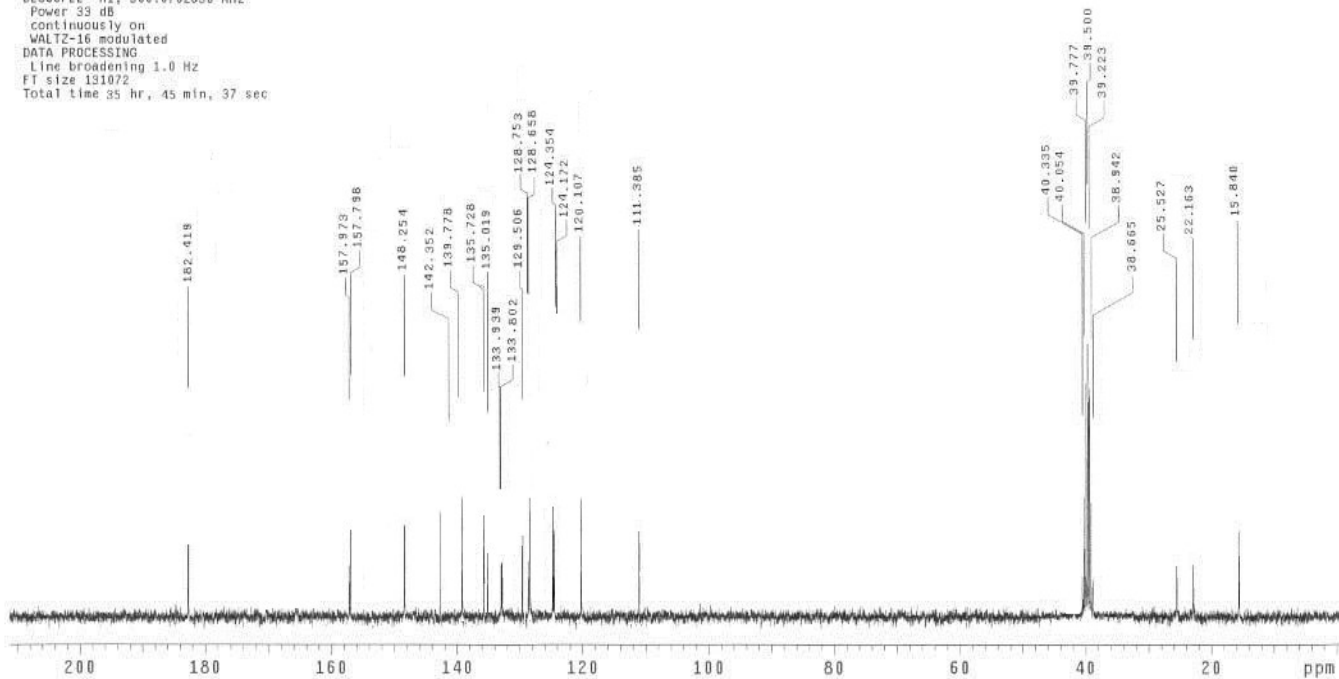

S8. <sup>13</sup>C NMR of compound 8b

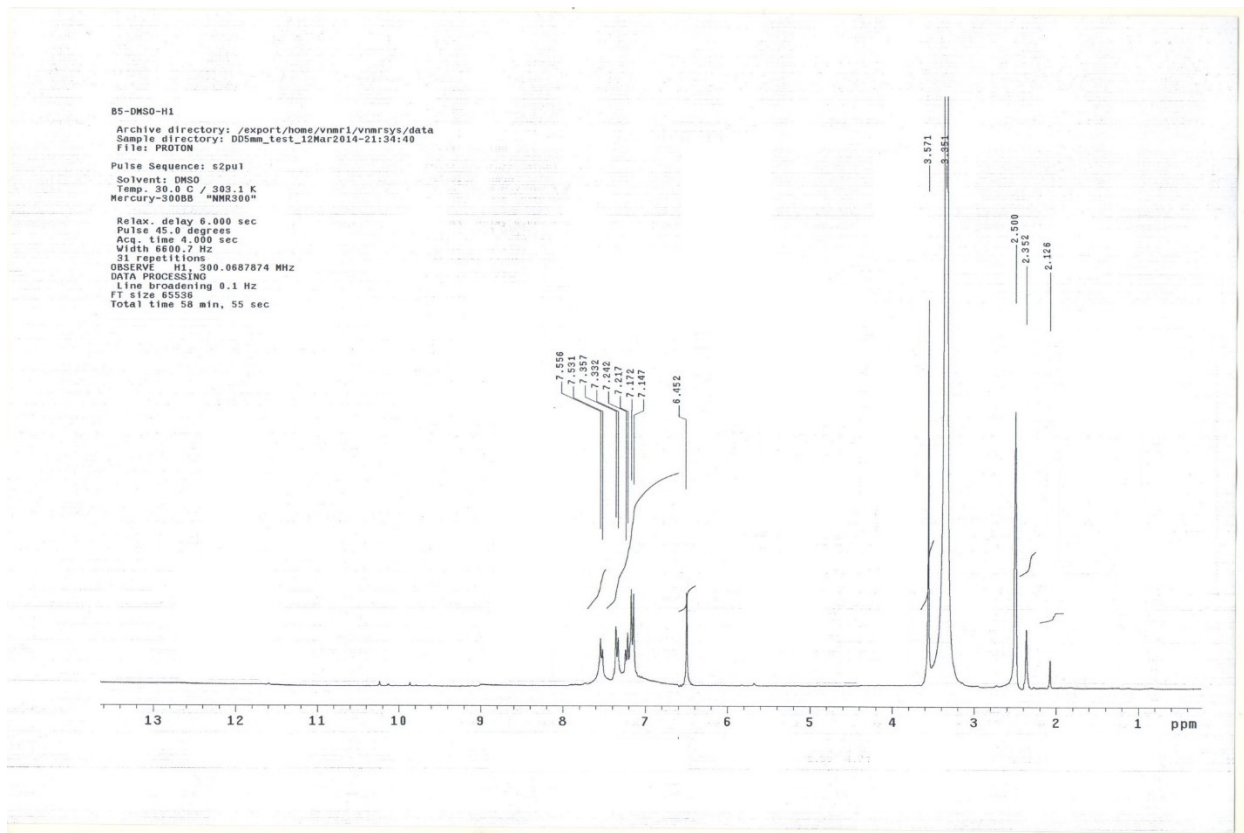

S9.  $^1\text{H}$  NMR of compound **8c**

B4-DMSO-C13

Archive directory: /export/home/vmar1/vmrsys/data  
Sample directory: DD5mm\_test\_12Mar2014-21:34:40  
File: PROTON

Pulse Sequence: s2pul

Solvent: DMSO  
Temp. 30.0 C / 303.1 K  
Mercury-300BB "NMR300"

Pulse 67.5 degrees  
Acq. time 1.707 sec  
Width 16761.7 Hz  
1376 repetitions  
OBSERVE C13, 75.4523971 MHz  
DECOUPLE H1, 300.0702830 MHz  
Power 40 dB  
continuously on  
WALTZ-16 modulated  
DATA PROCESSING  
Line broadening 1.0 Hz  
FT size 65536  
Total time 6 hr, 5 min, 42 sec

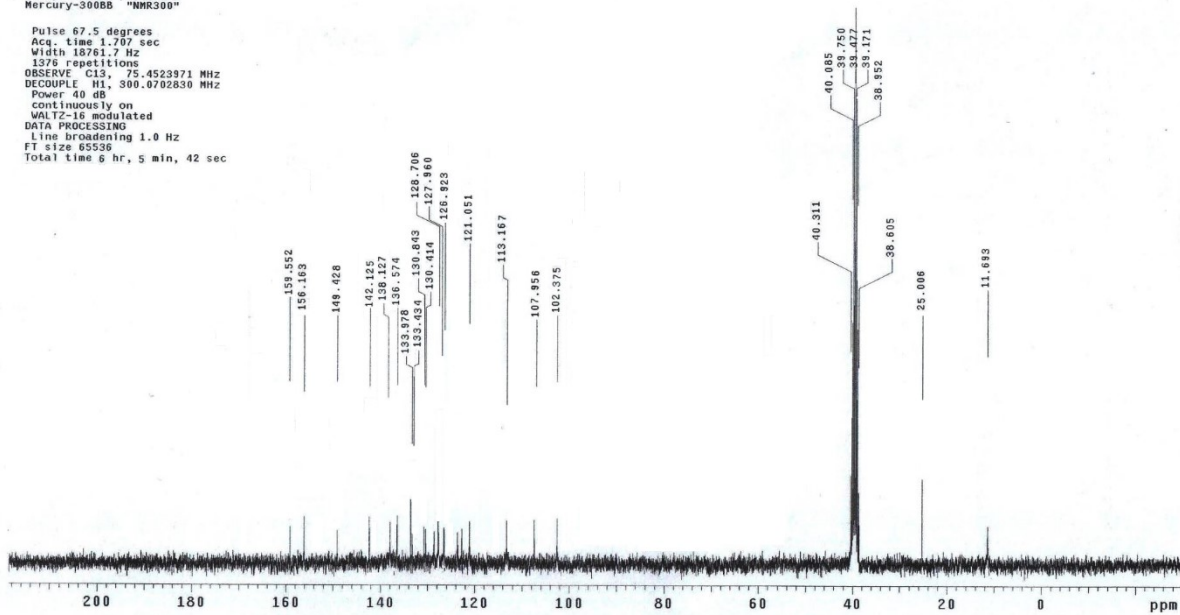

S10.  $^{13}\text{C}$  NMR of compound **8c**

Pulse Sequence: s2pu1  
Solvent: DMSO  
Temp. 30.0 C / 303.1 K  
Mercury-300BB "NMR300"  
  
Relax. delay 1.000 sec  
Pulse 10.6 degrees  
Acq. time 4.004 sec  
Width 8000.0 Hz  
128 repetitions  
OBSERVE H1, 300.0687875 MHz  
DATA PROCESSING  
FT size 65536  
Total time 19 min, 19 sec

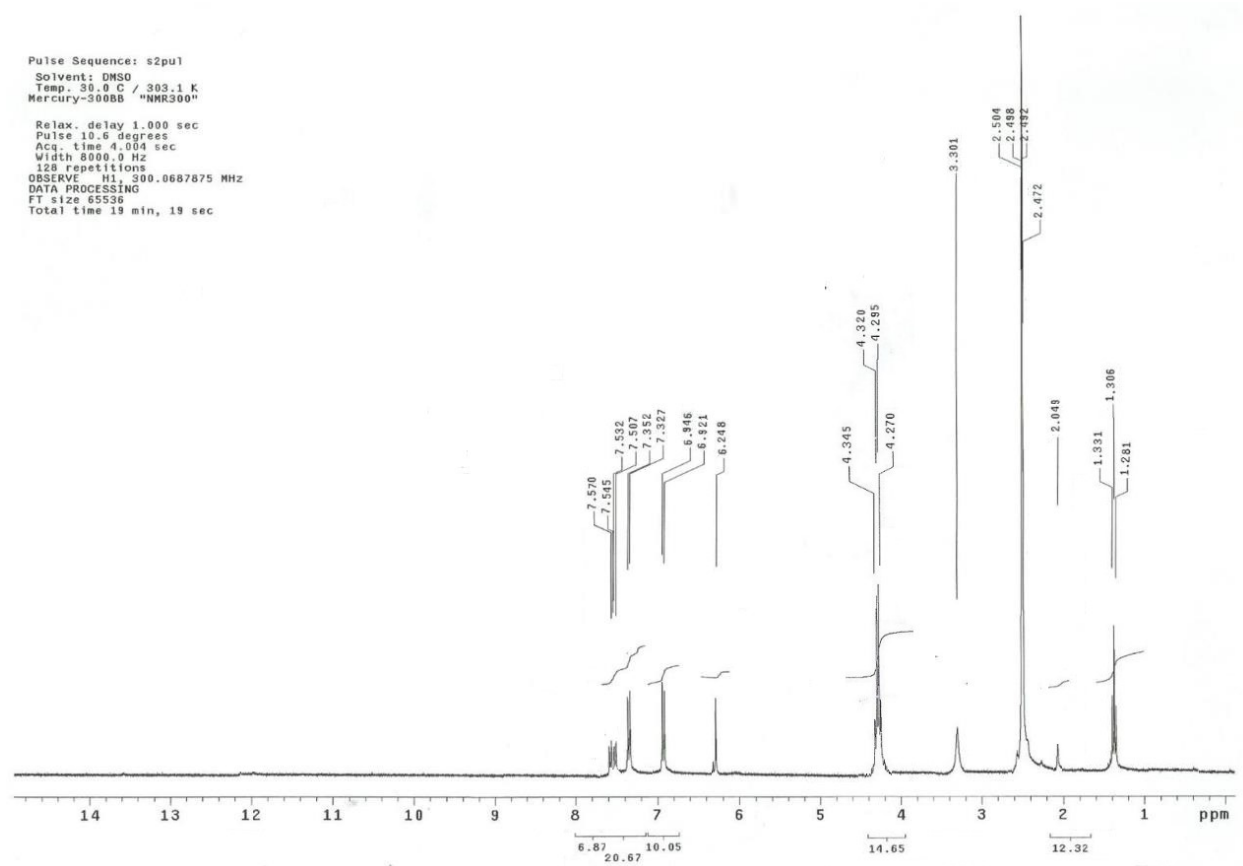

S11. <sup>1</sup>H NMR of compound 8d

Archive directory: /export/home/vnmr1/vnmrsys/data  
Sample directory: B05mm\_test\_12Mar2014-21:34:40  
File: PROTON

Pulse Sequence: s2pul  
Solvent: DMSO  
Temp. 40.0 C / 313.1 K  
Mercury-300BB "NMR300"

Pulse 45.0 degrees  
Acq. time 1.815 sec  
Width 18761.7 Hz  
1112 repetitions  
OBSERVE C13, 75.4523997 MHz  
DICOUPLE H1, 300.0702830 MHz  
Power 33 dB  
continuously on  
WALTZ-16 modulated  
DATA PROCESSING  
Line broadening 1.0 Hz  
FT size 131072  
Total time 32 hr, 58 min, 37 sec

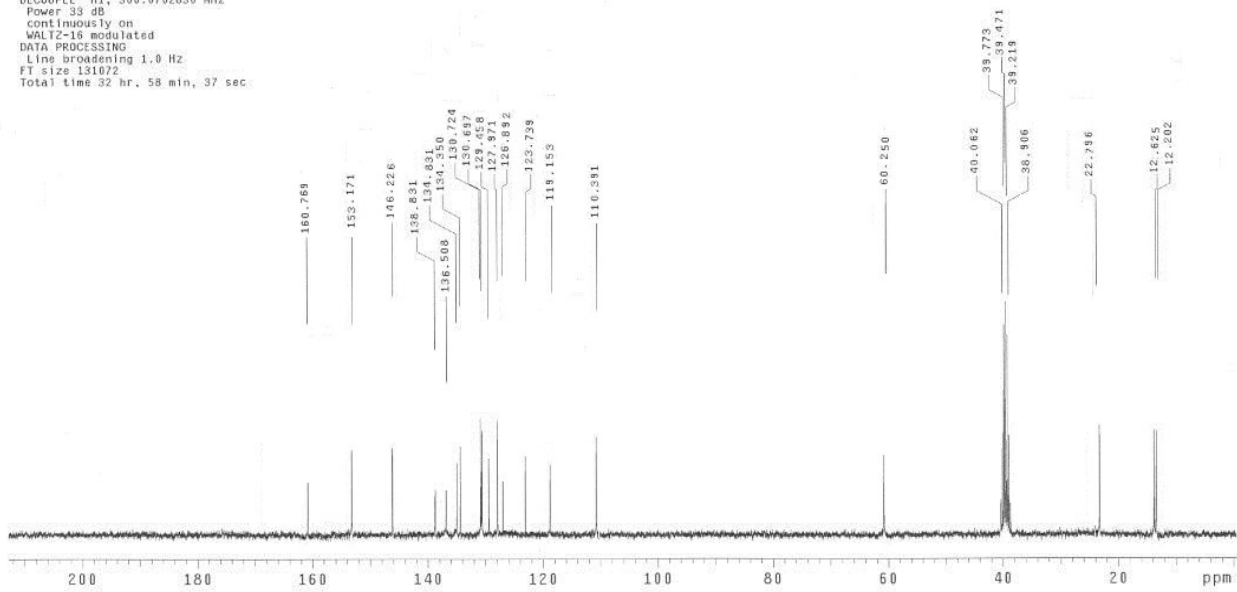

**S12.** <sup>13</sup>C NMR of compound **8d**



Pulse Sequence: s2pul  
Solvent: DMSO  
Temp. 30.0 C / 303.1 K  
Mercury-300BB "NMR300"

Relax. delay 1.000 sec  
Pulse 74.1 degrees  
Acq. time 4.004 sec  
Width 8000.0 Hz  
7 repetitions  
OBSERVE H1, 300.0687875 MHz  
DATA PROCESSING  
FT size 65536  
Total time 19 min, 19 sec

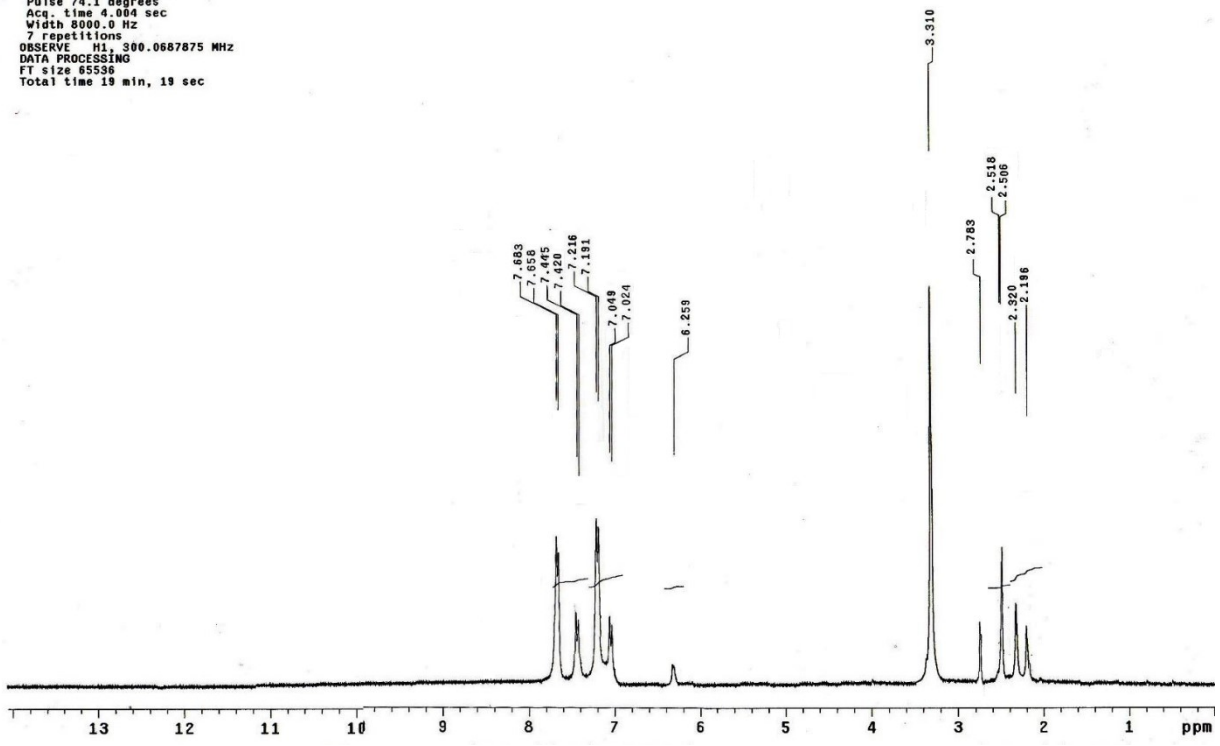

S13. <sup>1</sup>H NMR of compound 8e

Archive directory: /export/home/vnmr1/vnmrsys/data  
Sample directory: DD5mm\_test\_12Mar2014-21:34:40  
File: PROTON

Pulse Sequence: s2pu1

Solvent: DMSO  
Temp. 30.0 C / 303.1 K  
Mercury-300BB "NMR300"

Pulse 45.0 degrees  
Acq. time 1.815 sec  
Width 18761.7 Hz  
1768 repetitions  
OBSERVE C13, 75.4519974 MHz  
DECOUPLE H1, 300.0702830 MHz  
Power 33 dB  
continuously on  
WALTZ-16 modulated  
DATA PROCESSING  
Line broadening 1.0 Hz  
FT size 131072  
Total time 32 hr, 58 min, 37 sec

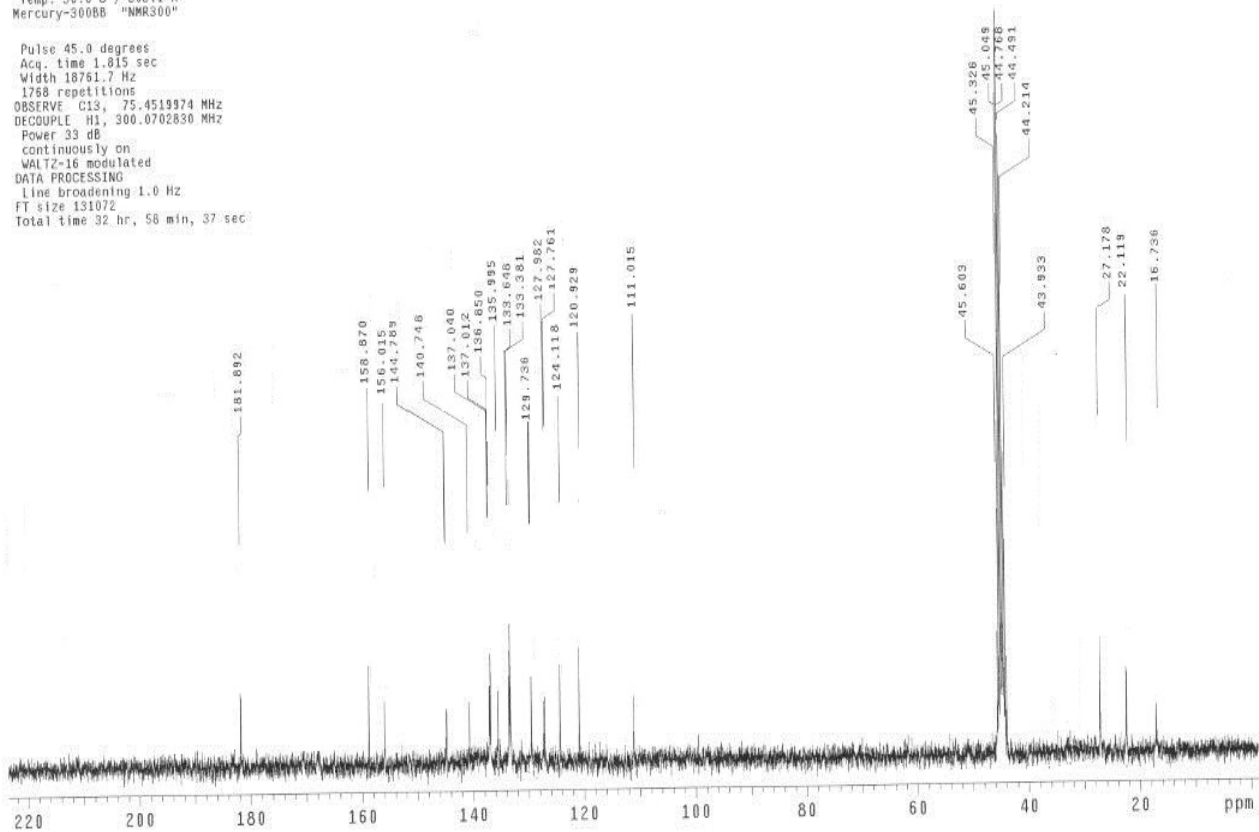

S14.  $^{13}\text{C}$  NMR of compound **8e**

Pulse Sequence: s2pu1  
Solvent: DMSO  
Temp: 30.0 C / 293.1 K  
Mercury-3000B "NMR300"  
  
Relax. delay 1.000 sec  
Pulse 10.6 degrees  
Acq. time 4.004 sec  
Width 8000.0 Hz  
128 repetitions  
OBSERVE: H1, 300.0687875 MHz  
DATA PROCESSING  
F1 size 65536  
Total time 19 min, 36 sec

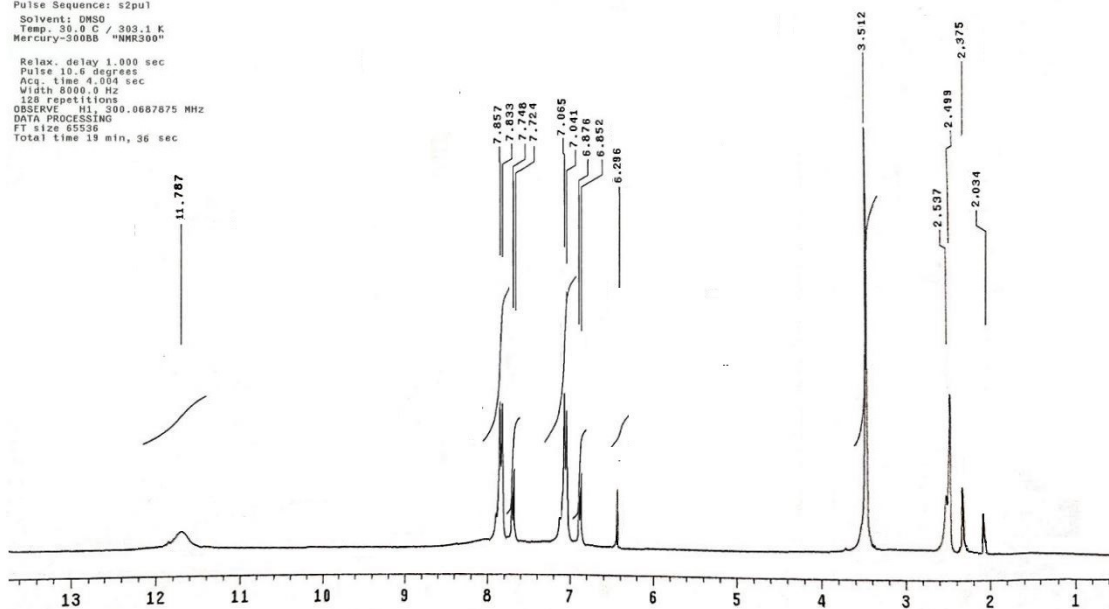

S15. <sup>1</sup>H NMR of compound 8f

Archive directory: /export/home/vnmr1/vnmrsys/data  
Sample directory: 005mm\_test\_12Mar2014-21:34:49  
File: PROTON

Pulse Sequence: s2pu1  
Solvent: DMSO  
Temp. 30.0 C / 303.1 K  
Mercury-300BB "NMR300"

Pulse 45.0 degrees  
Acq. time 1.815 sec  
Width 18761.7 Hz  
580 repetitions  
OBSERVE C13, 75.4523599 MHz  
DECOUPLE H1, 300.0702830 MHz  
Power 33 dB  
continuously on  
WALTZ-16 modulated  
DATA PROCESSING  
Line broadening 1.0 Hz  
FI size 131072  
Total time 22 hr, 57 min, 38 sec

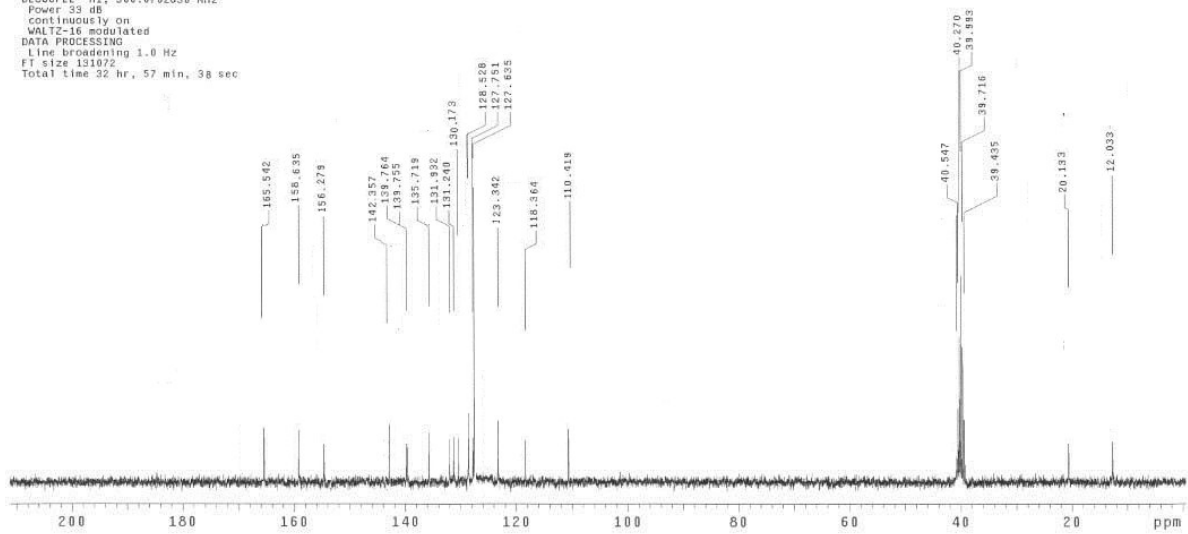

S16. <sup>13</sup>C NMR of compound 8f

M23-DMSO-H

Archive directory: /export/home/vnmri/vnmrsys/data  
Sample directory: D05mm\_test\_12Mar2014-21:34:40  
File: PROTON

Pulse Sequence: s2pu1

Solvent: DMSO  
Temp. 30.9 C / 303.1 K

Relax. delay 1.000 sec

Pulse 45.0 degrees

Acq. time 4.853 sec

Width 6600.7 Hz

11 repetitions

OBSERVE H1, 300.0687871 MHz

DATA PROCESSING

FT size 65536

Total time 43 min, 36 sec

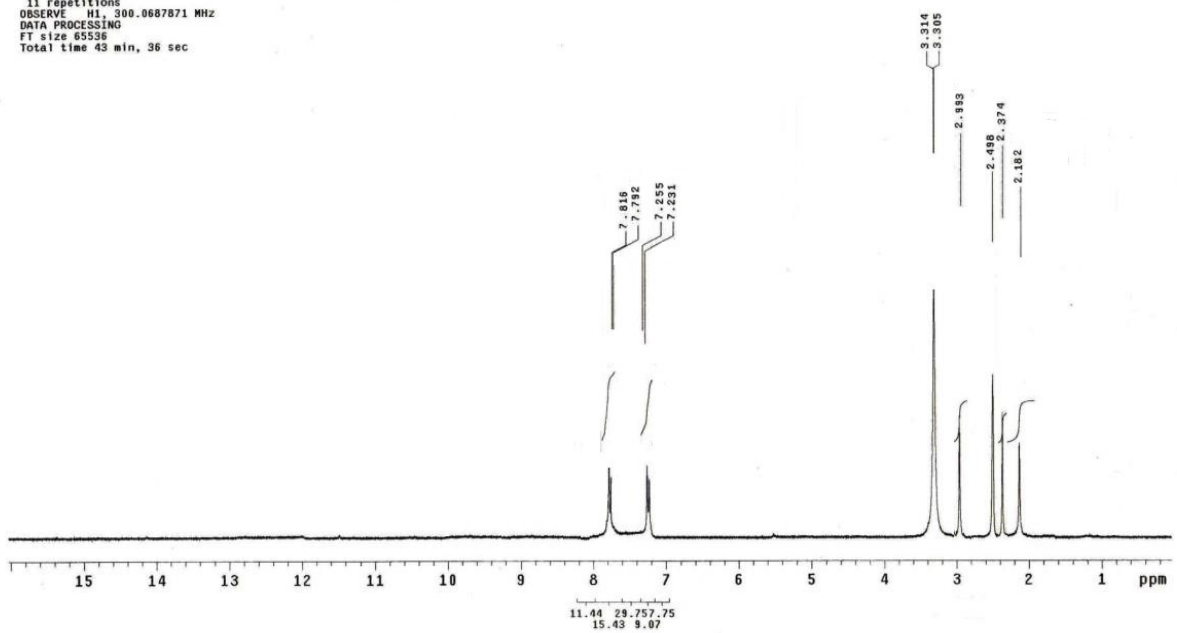

S17.  $^1\text{H}$  NMR of compound **10a**

Archive directory: /export/home/vnmr1/vnmrsys/data  
Sample directory: D05mm\_test\_12Mar2014-21:34:40

Pulse Sequence: s2pu1  
Solvent: DMSO  
Temp. 40.0 C / 313.1 K

Mercury-300BB "NMR300"

Pulse 45.0 degrees  
Acq. time 1.815 sec  
Width 18761.7 Hz  
344 repetitions  
OBSERVE C13, 75.4523988 MHz  
DECOUPLE H1, 300.6702830 MHz  
Power 33 dB  
continuously on  
WALTZ-16 modulated  
DATA PROCESSING  
Line broadening 1.0 Hz  
FT size 131072  
Total time 32 hr, 53 min, 37 sec

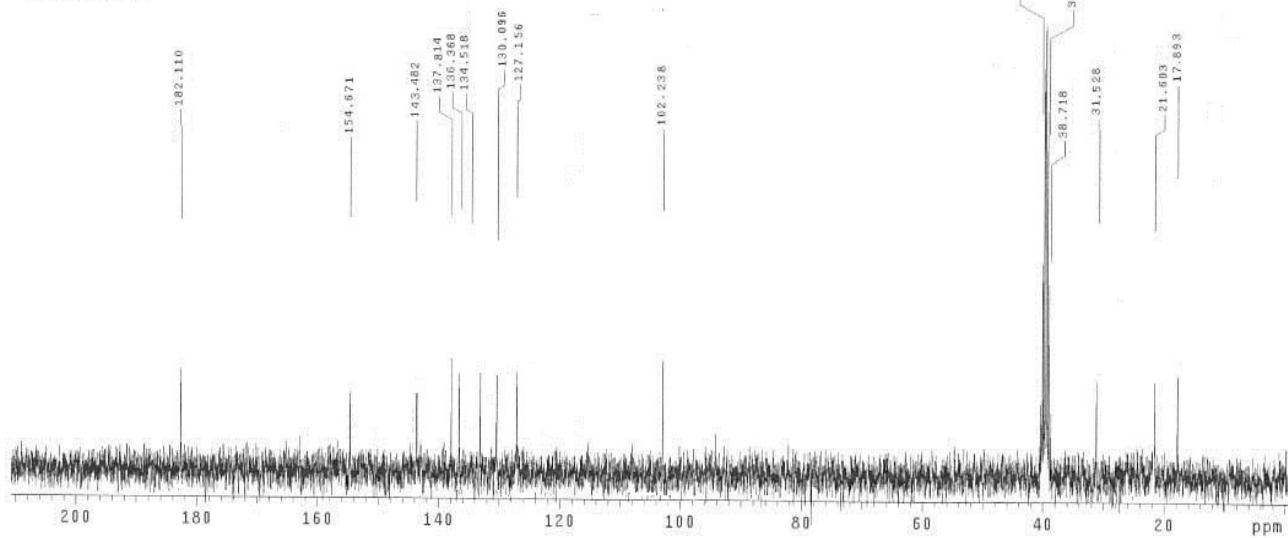

**S18.** <sup>13</sup>C NMR of compound 10a

M17-DMSO-H

Archive directory: /export/home/vnmr1/vnmrSYS/data  
Sample directory: DD5mm\_test\_12Mar2014-21:54:40  
File: PROTON

Pulse Sequence: s2pu1  
Solvent: DMSO  
Temp. 30.0 C / 303.1 K

Relax. delay 1.000 sec  
Pulse 45.0 degrees  
Acq. time 4.853 sec  
Width 6600.7 Hz

14 repetitions  
OBSERVE N1, 300.0687671 MHz  
DATA PROCESSING  
F1 size 65536  
Total time 45 min, 37 sec

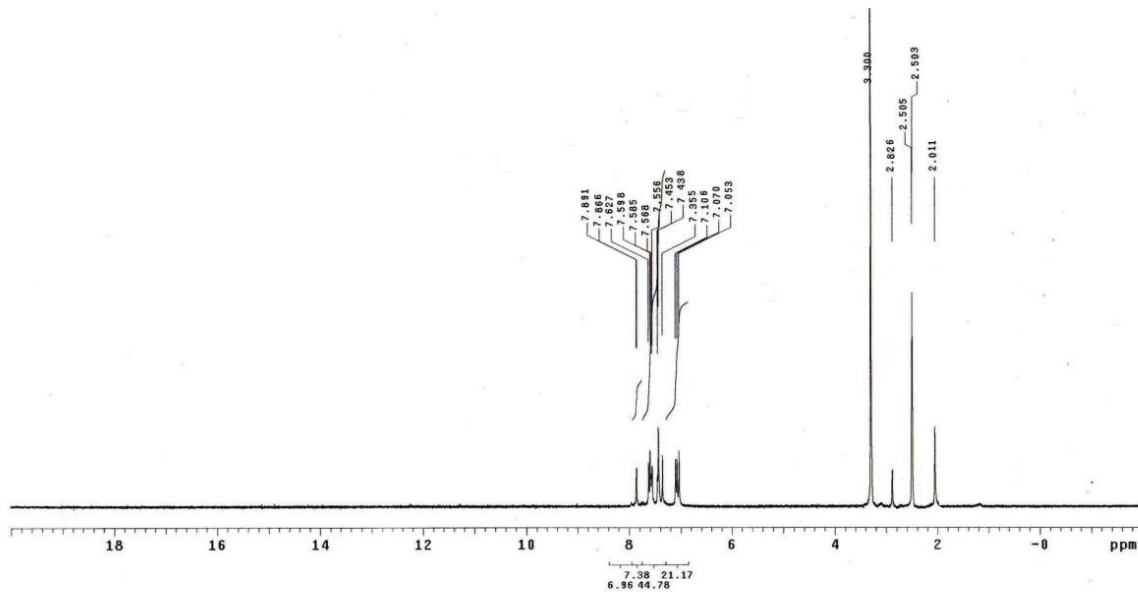

S19. <sup>1</sup>H NMR of compound 10b

M8-DMSO-C13  
Archive directory: /export/home/vnmr1/vnmrSYS/data  
Sample directory: D05sm\_test\_12Mar2014-21:34:40  
File: PROTON  
Pulse Sequence: s2pul  
Solvent: DMSO  
Temp: 35.0 C / 308.1 K  
Mercury-300SB "MMS300"  
Pulse 45.0 degree  
Acq. time 1.815 sec  
Width 18761.7 Hz  
2384 repetitions  
OBSERVE C13, 75.4524011 MHz  
DECOUPLE H1, 300.0702830 MHz  
Power 33 dB  
Continuously on  
WALTZ-16 modulated  
DATA PROCESSING  
Line broadening 1.0 Hz  
FT size 131072  
Total time 36 hr, 52 min, 31 sec

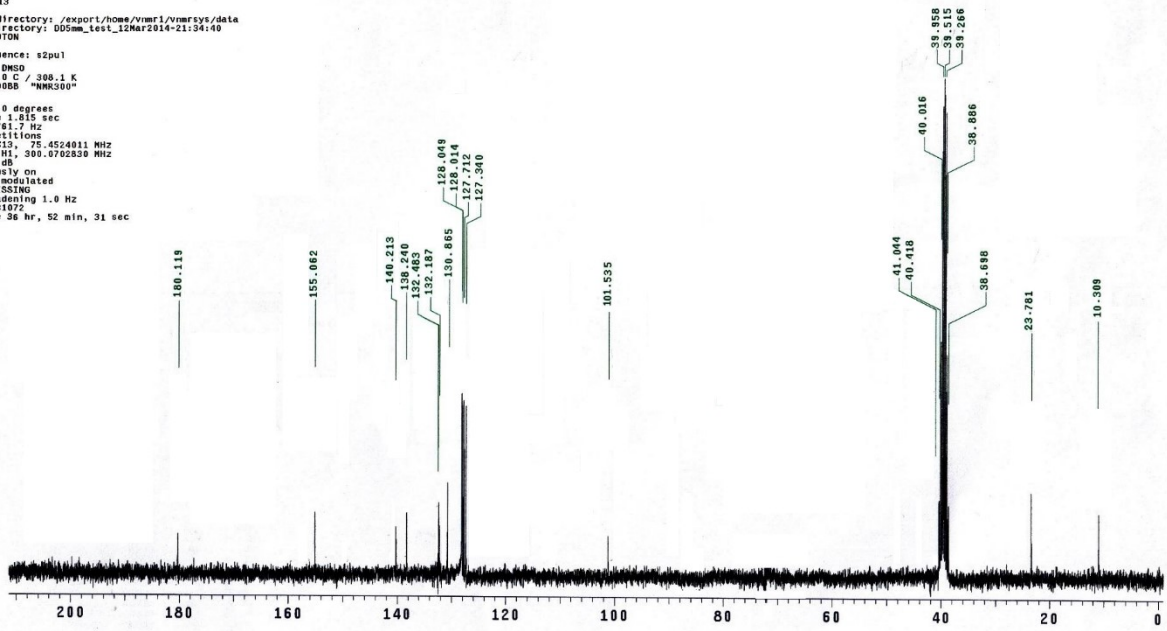

S20.  $^{13}\text{C}$  NMR of compound 10b
